# Supplementary material for: Whole-Transcriptome Sequencing Identifies Novel IRF2BP2-CDX1 Fusion Gene Brought about by Translocation t(1;5)(q42;q32) in Mesenchymal Chondrosarcoma
Source: PLoS One. 2012 Nov 21;7(11):e49705. doi: 10.1371/journal.pone.0049705 (PMC3504151; doi:10.1371/journal.pone.0049705)
Supplement: Table S1 — BAC probes used for FISH experiments in case 1. (XLS) [file pone.0049705.s001.xls]

## Sheet: Sheet1
	Supplementary Table S1
	BAC /fosmid	Band	UCSC position (hg19)	Gene(s)	Probe hybridization to
	RP11-637O7	5q31.1	chr5:132,151,538-132,336,436	AFF4	5q and der(5)
	RP11-166N1	5q32	chr5:146,012,377-146,194,502		5q and der(5)
	RP11-21I20	5q32	chr5:149,320,375-149,496,703	CSF1R	5q and der(5)
	CTD-2308I11	5q33.1	chr5:149,401,003-149,548,497	CSF1R, PDGFRB	5q and der(5)
	CTC-802J2	5q32	chr5:149,493,901-149,665,672	PDGFRB, CDX1, SLC6A7, CAMK2A	5q,der(5) and der(1)
	G248P81640F4	5q32	chr5:149,525,153-149,564,569	3´PDGFRB, CDX1	5q,der(5) and der(1)
	CTD-2514E15	5q32-33.1	chr5:149,668,690-149,857,670		5q and der(1)
	RP11-264N19	5q33.1	chr5:149,824,594-149,997,273		5q and der(1)
	RP11-904K2	5q33.1	chr5:151,242,350-151,419,476		5q and der(1)
	RP11-455A15	5q33.3	chr5:156,827,699-156,996,182		5q and der(1)
	RP11-165K21	5q33.3	chr5:159,492,793-159,648,272		5q and der(1)
	CTD-2009H16	5q34	chr5:162,828,650-162,924,123		5q and der(1)
	RP11-347H11	1q42.2	chr1:234,525,172-234,686,386		1q and der(1)
	RP11-557K5	1q42.2	chr1:234,655,984-234,857,514	IRF2BP2	1q and der(1)
	Rp11-278O12	1q42.3	chr1:234,809,303-234,991,729		1q and der(1)
	BAC and fosmid clones overlapping breakpoint position are given in bold. BAC clones from the Human BAC-PAC Rearray are in
	italics.
